# Supplementary material for: A vanadium-based oxide-nitride heterostructure as a multifunctional sulfur host for advanced Li–S batteries
Source: Royal Society of Chemistry journal article supplement (doi:10.1039/d1nr03763c), 2021-01-01
Supplement: d1nr03763c1.pdf [file d1nr03763c1.pdf]

## Supporting information

### **Vanadium based oxide-nitride heterostructure as a multifunctional sulfur host for advanced Li-S batteries**

Menglong Zhao,<sup>#a</sup> Yang Lu,<sup>\*#a</sup> Ya Yang,<sup>a</sup> Mengjie Zhang,<sup>a</sup> Zhenjie Yue,<sup>a</sup> Ning Zhang,<sup>a</sup> Tao Peng,<sup>a</sup> Xianming Liu,<sup>b</sup> and Yongsong Luo<sup>\*ac</sup>

*<sup>a</sup>Henan Joint International Research Laboratory of New Energy Storage Technology, Key Laboratory of Microelectronics and Energy of Henan Province, School of Physics and Electronic Engineering, Xinyang Normal University, Xinyang 464000, P. R. China.*

*<sup>b</sup>College of Chemistry and Chemical Engineering, Luoyang Normal University, Luoyang 471934, P. R. China.*

*<sup>c</sup>College of Physics and Electronic Engineering, Nanyang Normal University, Nanyang 473061, P. R. China.*

---

\*Corresponding author. Tel./fax: +86 376 6390801, E-mail: [luyang.181@163.com](mailto:luyang.181@163.com) (Y. Lu), [ysluo@xynu.edu.cn](mailto:ysluo@xynu.edu.cn) (Y. S. Luo).

<sup>#</sup>Yang Lu and Menglong Zhao contributed equally to this work.

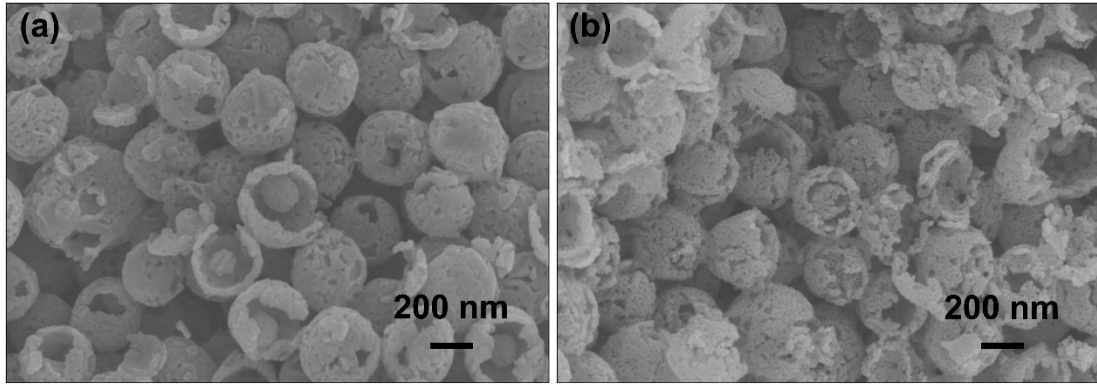

**Figure S1.** (a) SEM image of V<sub>2</sub>O<sub>3</sub>@C; (b) SEM image of VN@NC.

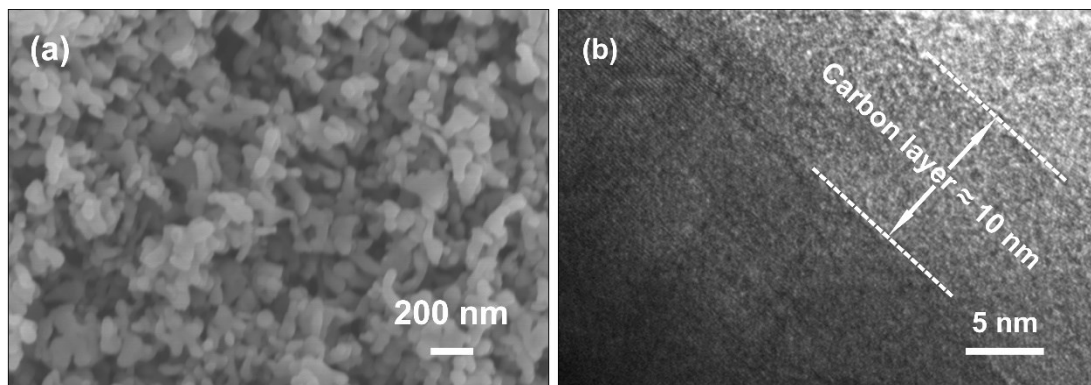

**Figure S2.** (a) SEM image of  $V_2O_3$ -VN without the outer glucose layer; (b) TEM image of the  $V_2O_3$ -VN@NC with the carbon layer.

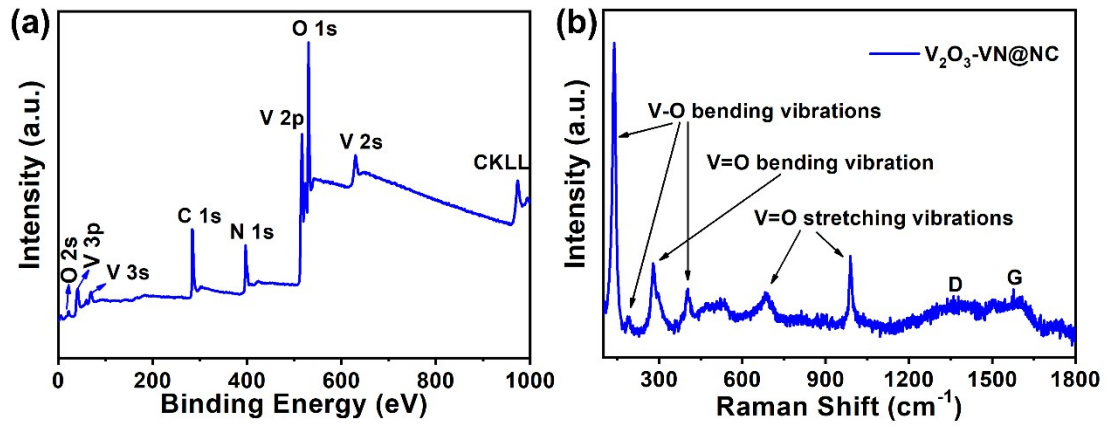

**Figure S3.** (a) XPS survey spectrum of V<sub>2</sub>O<sub>3</sub>-VN@NC; (b) Raman spectral of V<sub>2</sub>O<sub>3</sub>-VN@NC.

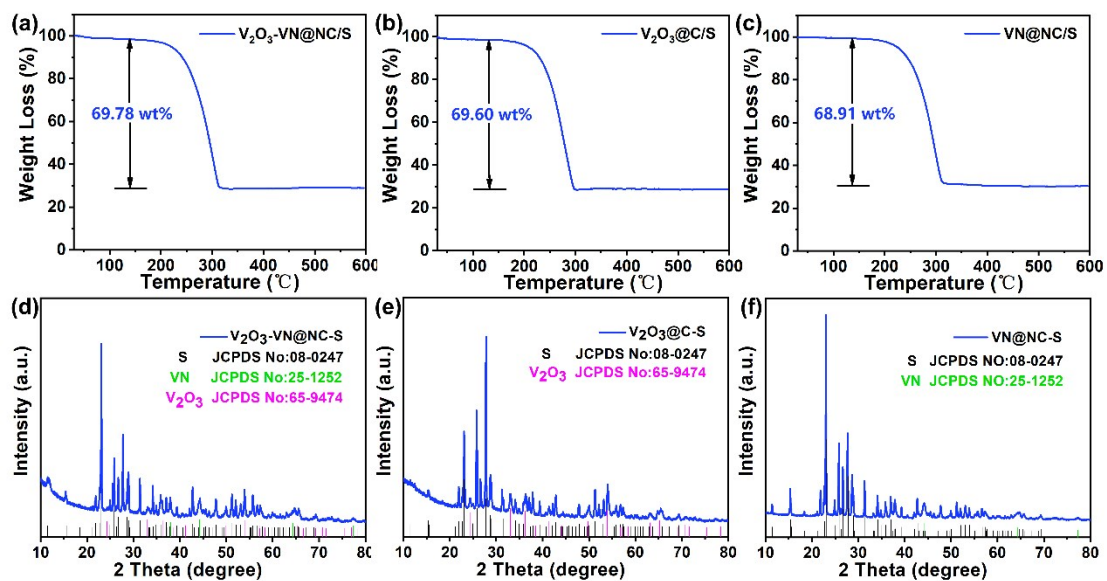

**Figure S4.** TG curves of the V<sub>2</sub>O<sub>3</sub>-VN@NC/S (a), V<sub>2</sub>O<sub>3</sub>@C/S (b) and VN@NC/S (c) composites; and corresponding XRD pattern of V<sub>2</sub>O<sub>3</sub>-VN@NC/S (d), V<sub>2</sub>O<sub>3</sub>@C/S (e) and VN@NC/S (f) composites.

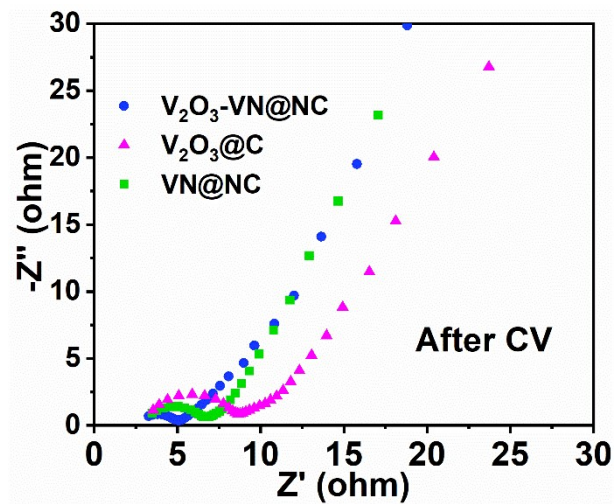

**Figure S5.** EIS curves of  $V_2O_3$ @C/S, VN@NC/S and  $V_2O_3$ -VN@NC/S electrodes after cycling.

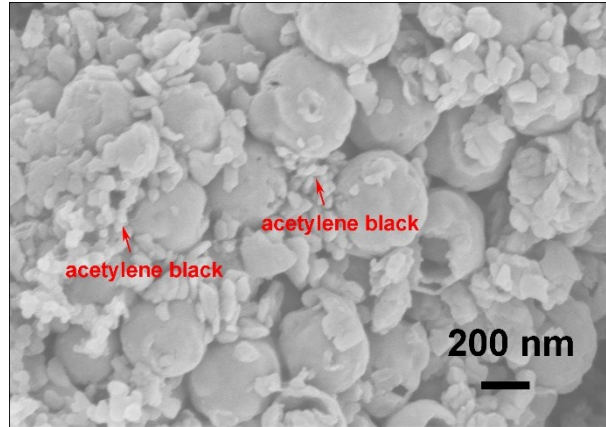

**Figure S6.** SEM image of V<sub>2</sub>O<sub>3</sub>-VN@NC/S electrodes after 800 cycles at 1C.

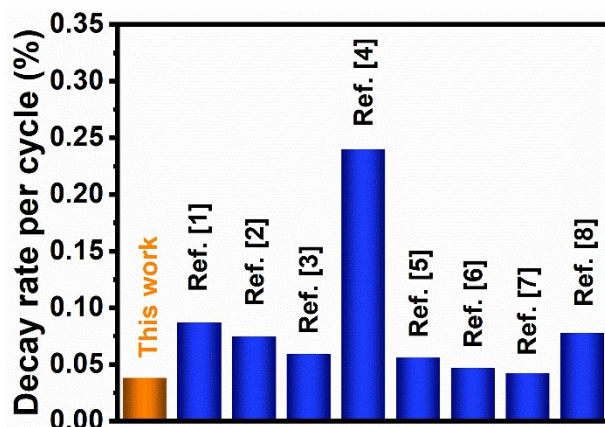

**Figure S7.** Comparison of decay rate per cycle for Li-S batteries between this work and other reported studies.

#### Supplementary References

1. Y. N. Fan, F. Ma, J. S. Liang, X. Chen, Z. P. Miao, S. Duan, L. Wang, T. Y. Wang, J. T. Han, R. G. Cao, S. H. Jiao and Q. Li, *Nanoscale*, 2020, **12**, 584-590.
2. S. D. Seo, D. Park, S. Park and D. W. Kim, *Adv. Funct. Mater.*, 2019, **29**, 1903712.
3. L. Y. Hu, C. L. Dai, H. Liu, Y. Li, B. L. Shen, Y. M. Chen, S. J. Bao and M. W. Xu, *Adv. Energy Mater.*, 2018, **8**, 1800709.
4. X. X. Li, K. Ding, B. Gao, Q. W. Li, Y. Y. Li, J. J. Fu, X. M. Zhang, P. K. Chu and K. F. Huo, *Nano Energy*, 2017, **40**, 655-662.
5. C. Ye, Y. Jiao, H. Y. Jin, A. D. Slattery, K. Davey, H. H. Wang and S. Z. Qiao, *Angew. Chem. Int. Ed.*, 2018, **57**, 16703-16707.
6. Z. G. Wang, K. Yu, S. J. Gong, E. Du and Z. Q. Zhu, *Nanoscale*, 2020, **12**, 18950-18964.
7. S. N. Gu, Z. W. Bai, S. Majumder, B. L. Huang and G. H. Chen, *Nanoscale*, 2019, **11**, 20579-20588.
8. L. B. Ma, H. N. Lin, W. J. Zhang, P. Y. Zhao, G. Y. Zhu, Y. Hu, R. P. Chen, Z. X. Tie, J. Liu, Z. Jin, *Nano Lett.*, 2018, **18**, 7949-7954.



**Table S1.** Summary of  $D_{\text{H}^+}$  at peaks i, ii, iii for  $\text{V}_2\text{O}_3@\text{C}$ ,  $\text{VN}@\text{NC}$  and  $\text{V}_2\text{O}_3\text{-VN}@\text{NC}$  cells.

| CV Peak  | $\text{V}_2\text{O}_3@\text{C}$              | $\text{VN}@\text{NC}$                        | $\text{V}_2\text{O}_3\text{-VN}@\text{NC}$   |
|----------|----------------------------------------------|----------------------------------------------|----------------------------------------------|
| Peak i   | $3.668 \times 10^{-9} \text{ cm}^2/\text{s}$ | $1.702 \times 10^{-8} \text{ cm}^2/\text{s}$ | $1.924 \times 10^{-8} \text{ cm}^2/\text{s}$ |
| Peak ii  | $5.672 \times 10^{-9} \text{ cm}^2/\text{s}$ | $1.391 \times 10^{-8} \text{ cm}^2/\text{s}$ | $1.706 \times 10^{-8} \text{ cm}^2/\text{s}$ |
| Peak iii | $1.232 \times 10^{-8} \text{ cm}^2/\text{s}$ | $8.633 \times 10^{-8} \text{ cm}^2/\text{s}$ | $9.823 \times 10^{-8} \text{ cm}^2/\text{s}$ |
